# Supplementary material for: Ecologically viable carbon nano-onions for the efficient removal of methyl orange azo dye and its environmental assessment
Source: Royal Society of Chemistry journal article supplement (doi:10.1039/d4ew00014e), 2024-01-01
Supplement: d4ew00014e1.pdf [file d4ew00014e1.pdf]

## Supplementary information

### Ecologically Viable Carbon Nano Onions for the Efficient Removal of Methyl Orange Azo Dye and its Environmental Assessment

Poonam Kumari<sup>a</sup>, Kumud Malika Tripathi<sup>b</sup>, Kamlendra Awasthi<sup>c\*</sup>, Ragini Gupta<sup>a,d\*</sup>

<sup>a</sup> Department of Chemistry, Malaviya National Institute of Technology Jaipur, Rajasthan  
302017, INDIA

<sup>b</sup> Department of Chemistry, Indian Institute of Petroleum and Energy, Vishakhapatnam,  
Andhra Pradesh 530003, INDIA

<sup>c</sup> Department of Physics, Malaviya National Institute of Technology Jaipur, Rajasthan  
302017, INDIA

<sup>d</sup> Materials Research Centre, Malaviya National Institute of Technology Jaipur, Rajasthan  
302017, INDIA

\* rgupta.chy@mnit.ac.in, kawasthi.phy@mnit.ac.in

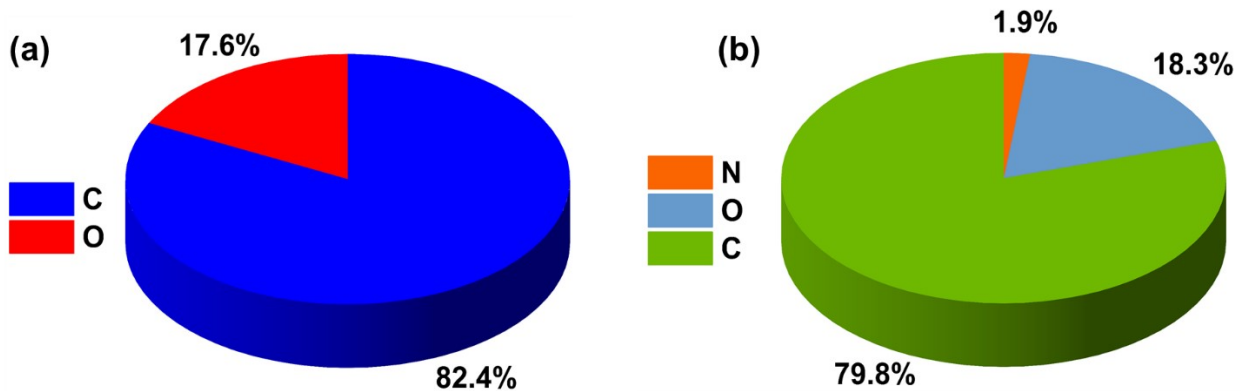

Fig. S1 Elemental composition in XPS spectra of CNOs before and after MO dye adsorption

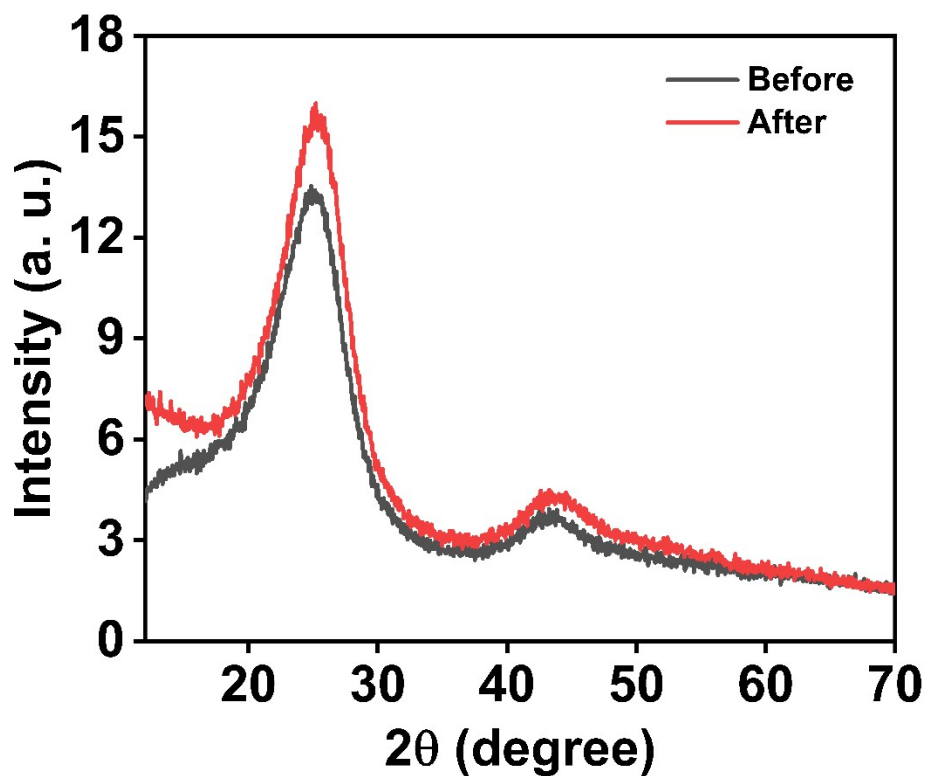

Fig. S2 XRD spectra of CNOs before and after MO dye adsorption

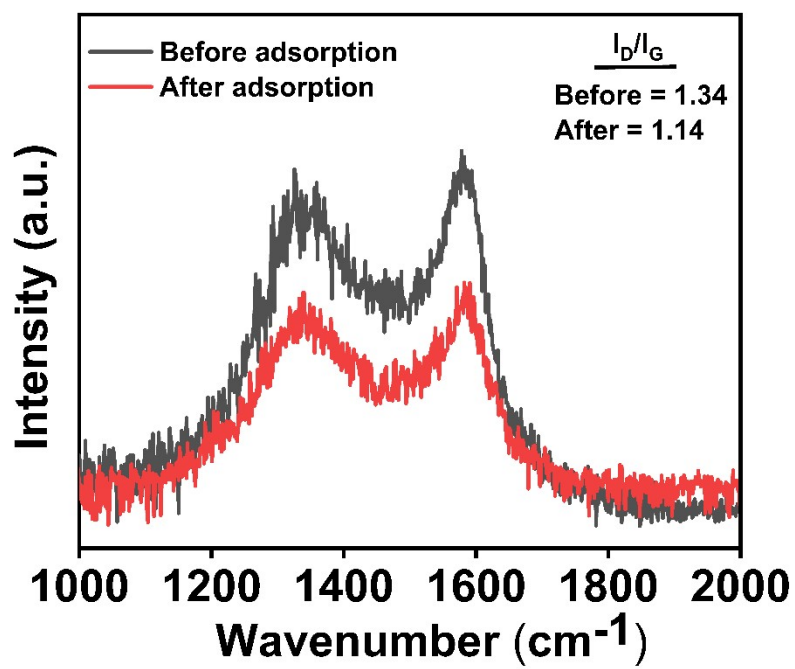

Fig. S3 Raman spectra of CNOs before and after MO dye adsorption
